# Supplementary material
Source: PubMed Central journal article supplement (PMC5815032)
Supplement: jamacardiol-2-598-s001.pdf [file jamacardiol-2-598-s001.pdf]

## Supplementary Online Content

Koren MJ, Sabatine MS, Giugliano RP, et al. Long-term low-density lipoprotein cholesterol-lowering efficacy, persistence, and safety of evolocumab in chronic treatment of hypercholesterolemia: results up to 4 years from the open-label OSLER-1 extension study. *JAMA Cardiol*. Published online March 14, 2017. doi:10.1001/jamacardio.2017.0747

**eTable 1.** Statin Use From First Evolocumab Dose to Last Day of Reporting

**eTable 2.** Other Lipid Parameters

This supplementary material has been provided by the authors to give readers additional information about their work.

**eTable 1. Statin Use From First Evolocumab Dose to Last Day of Reporting**

| Statin Intensity at First Evolocumab Dose (Evolocumab + SOC n=1255) | Statin Intensity at Last Day of Evolocumab Reporting |                                   |                              |                                    |                               | Total      |
|---------------------------------------------------------------------|------------------------------------------------------|-----------------------------------|------------------------------|------------------------------------|-------------------------------|------------|
|                                                                     | No Statin Therapy                                    | Unknow n Statin Therapy Intensity | Low-Intensity Statin Therapy | Moderate -Intensity Statin Therapy | High-Intensity Statin Therapy |            |
|                                                                     | n (%)                                                | n (%)                             | n (%)                        | n (%)                              | n (%)                         | n (%)      |
| No Statin Therapy                                                   | 347 (27.6)                                           | 1 (0.1)                           | 7 (0.6)                      | 7 (0.6)                            | 7 (0.6)                       | 369 (29.4) |
| Unknown Statin Therapy Intensity                                    | 0 (0.0)                                              | 0 (0.0)                           | 0 (0.0)                      | 0 (0.0)                            | 0 (0.0)                       | 0 (0.0)    |
| Low-Intensity Statin Therapy                                        | 27 (2.2)                                             | 1 (0.1)                           | 178 (14.2)                   | 10 (0.8)                           | 3 (0.2)                       | 219 (17.5) |
| Moderate-Intensity Statin Therapy                                   | 76 (6.1)                                             | 0 (0.0)                           | 17 (1.4)                     | 312 (24.9)                         | 13 (1.0)                      | 418 (33.3) |
| High-Intensity Statin Therapy                                       | 12 (1.0)                                             | 0 (0.0)                           | 1 (0.1)                      | 24 (1.9)                           | 212 (16.9)                    | 249 (19.8) |
| Total                                                               | 462 (36.8)                                           | 2 (0.2)                           | 203 (16.2)                   | 353 (28.1)                         | 235 (18.7)                    | 1255       |

**eTable 2. Other Lipid Parameters**

| Study Visit Week | ApoB, mg/dL, mean (SE) | Lp(a), nmol/L, median (Q1, Q3) | Triglycerides, mg/dL, median (Q1, Q3) | HDL-C, mg/dL, mean (SE) | ApoA1, mg/dL, mean (SE) |
|------------------|------------------------|--------------------------------|---------------------------------------|-------------------------|-------------------------|
| Parent Baseline  | 111.3 (0.7)            | 37 (12.0, 125.0)               | 123.3 (93.0, 167.8)                   | 53.6 (0.4)              | 154.6 (0.8)             |
| OSLER-1 Week 64  | 60.6 (0.7)             | 19.0 (6.0, 76.0)               | 107.0 (81.0, 150.0)                   | 58.0 (0.5)              | 162.5 (0.8)             |
| OSLER-1 Week 100 | 62.0 (0.7)             | 21.0 (6.0, 74.0)               | 110.0 (82.0, 152.0)                   | 59.5 (0.5)              | 165.2 (0.9)             |
| OSLER-1 Week 160 | 63.6 (0.8)             | 19.0 (7.0, 74.0)               | 110.0 (82.0, 153.0)                   | 58.6 (0.5)              | 166.1 (0.9)             |
| OSLER-1 Week 208 | 66.5 (1.0)             | 19.0 (6.0, 86.0)               | 115.0 (83.0, 162.0)                   | 58.4 (0.6)              | 167.1 (1.1)             |

Conversion factors for System International (SI) units: ApoA1, 1 mg/dL=0.3571  $\mu$ mol/L; ApoB, 1 mg/dL=0.0195  $\mu$ mol/L; HDL-C, 1 mg/dL=0.02586 mmol/L; triglycerides, 1 mg/dL=0.01129 mmol/L

Apo, apolipoprotein; HDL-C, high-density lipoprotein cholesterol; Lp(a), lipoprotein(a)
